# Supplementary material for: Reevaluation of ambiguous genetic variants in sudden unexplained deaths of a young cohort
Source: PubMed Central journal article supplement (PMC9902310; doi:10.1007/s00414-023-02951-0), 2023-01-25

## Supplemental

### Reevaluation of ambiguous genetic variants in sudden unexplained deaths of a young cohort

#### Suppl.1

##### Genetic analysis

A resequencing custom-made panel including the most prevalent genes associated with IAS and SIDS was used (*ABCC9*, *ACTA2*, *ACTC1*, *ACTN2*, *AKAP9*, *ANK2*, *BAG3*, *CACNA1C*, *CACNA1G*, *CACNA1H*, *CACNA1I*, *CACNB2*, *CASQ2*, *CAV3*, *CHRM2*, *COL3A1*, *CRYAB*, *CSRP3*, *CTF1*, *DES*, *DMD*, *DMPK*, *DSC2*, *DSG2*, *DSP*, *ECE1*, *EMD*, *EN1*, *EYA4*, *FBN1*, *FHL2*, *FKTN*, *GJA7*, *GLA*, *GPD1L*, *HCN1*, *HCN2*, *HCN4*, *ILK*, *JPH2*, *JUP*, *KCNA4*, *KCNA5*, *KCND2*, *KCND3*, *KCNE1*, *KCNE2*, *KCNE3*, *KCNH2*, *KCNJ2*, *KCNJ3*, *KCNJ5*, *KCNK4*, *KCNQ1*, *LAMA4*, *LAMP2*, *LDB3*, *LMNA*, *MYBPC3*, *MYH6*, *MYH7*, *MYL2*, *MYL3*, *MYLK2*, *MYOZ2*, *MYPN*, *NEBL*, *NEXN*, *NOS1AP*, *NOTCH1*, *NPPA*, *NUP155*, *PDLIM3*, *PHOX2A*, *PHOX2B*, *PKP2*, *PLN*, *PRKAG2*, *PSEN1*, *PSEN2*, *RBM20*, *RET*, *RYR2*, *SCN10A*, *SCN1B*, *SCN2B*, *SCN3B*, *SCN4B*, *SCN5A*, *SGCA*, *SGCB*, *SGCD*, *SIRT3*, *SLC25A4*, *SLC6A4*, *SLC8A1*, *SLMAP*, *SNTA1*, *TAZ*, *TCAP*, *TGFB3*, *TGFBRI*, *TGFBR2*, *TLX3*, *TMEM43*, *TMPO*, *TNNC1*, *TNNI3*, *TNNT2*, *TPM1*, *TTN*, and *VCL*). All gene isoforms are described in Ensembl 75 ([www.ensembl.org/](http://www.ensembl.org/)) linked to a RefSeq code ([www.ncbi.nlm.nih.gov/refseq/](http://www.ncbi.nlm.nih.gov/refseq/)) or CCDS ([www.ncbi.nlm.nih.gov/CCDS/](http://www.ncbi.nlm.nih.gov/CCDS/)). Bioinformatic analysis included adaptor and low-quality base trimming of the FASTQ files. Trimmed reads were mapped with GEM III. The output was sorted, also uniquely and properly mapped read pairs were selected. Variant calling from the cleaned BAM files was performed with SAMtools v.1.2 and an *ad hoc*-developed script. The final annotation steps provided information included in public databases. Identified uncommon genetic variants, minor allele frequency (MAF) <1%, were confirmed by conventional Sanger sequencing. The exons and exon–intron boundaries of each gene were amplified in both directions.

All sequences were reanalyzed with the updated software (SeqScape v2.7, Applied Biosystems). No new rare variants were identified in any of the analyzed genes. The original classification compared rare variants with DNA sequences from 300 healthy Spanish individuals (individuals not related to any index case and of the same ethnicity) as control cases contrasted with the Genome Aggregation Database (gnomAD) ([www.gnomad.broadinstitute.org/](http://www.gnomad.broadinstitute.org/)). Sequence variants were described following the Human Genome Variation Society (HGVS) rules ([www.hgvs.org/](http://www.hgvs.org/)). Currently, all rare missense variants were contrasted in the gnomAD ([www.gnomad.broadinstitute.org/](http://www.gnomad.broadinstitute.org/)). All rare variants were also consulted in ClinGen ([www.clinicalgenome.org/](http://www.clinicalgenome.org/)), VarSome ([www.varsome.com/](http://www.varsome.com/)), the SCD-associated Variants Annotation Database (SVAD) ([www.svad.mbc.nctu.edu.tw/](http://www.svad.mbc.nctu.edu.tw/)), CardioClassifier ([www.cardioclassifier.org/](http://www.cardioclassifier.org/)), InterVar ([www.wintervar.wglab.org/](http://www.wintervar.wglab.org/)), CardioVAI ([www.cardiovai.engenome.com/](http://www.cardiovai.engenome.com/)), and CardioBoost ([www.cardiodb.org/cardioboost/](http://www.cardiodb.org/cardioboost/)).

## **Suppl. 2**

### **Data sources**

Until June 2022, an exhaustive review of all available data on each rare variant was performed independently by three authors (EMB, GSB, OC), compared and verified. Data were collected from the Human Gene Mutation Database (HGMD) ([www.hgmd.org](http://www.hgmd.org)), ClinVar ([www.ncbi.nlm.nih.gov/clinvar/intro/](http://www.ncbi.nlm.nih.gov/clinvar/intro/)), the National Center for Biotechnology Information single-nucleotide polymorphism (SNP) database ([www.ncbi.nlm.nih.gov/SNP](http://www.ncbi.nlm.nih.gov/SNP)), Index Copernicus ([www.en.indexcopernicus.com](http://www.en.indexcopernicus.com)), Google Scholar ([www.scholar.google.es](http://www.scholar.google.es)), Springer Link ([www.link.springer.com](http://www.link.springer.com)), Science Direct ([www.sciencedirect.com](http://www.sciencedirect.com)), the Excerpta Medica Database ([www.elsevier.com/solutions/embase-biomedical-research](http://www.elsevier.com/solutions/embase-biomedical-research)), and the IEEE Xplore Digital Library ([www.ieeexplore.ieee.org/Xplore/home.jsp](http://www.ieeexplore.ieee.org/Xplore/home.jsp)).

## **Tables legend (as Electronic Supplemental File)**

**(ESP\_Tab1) Table 1.- Genetic data of rare variants.** ACMG: American College of Medical Genetics and Genomics, B: benign, ClinVar: Clinical Variant, dbSNP: Single Nucleotide Polymorphism database, ExAC: Exome Aggregation Consortium, GnomAD: Genome Aggregation Database, LB: likely benign, LP: likely pathogenic, NA: not available, P: pathogenic, VUS: variant of uncertain significance.

**(ESP\_Tab2) Table 2.- Cohort analyzed.**

**Figures legend (as Electronic Supplemental File)**

**(ESP\_Fig1) Figure 1.- Reclassification of rare variants.** A.- All cohort. B.- All cohort concerning genes associated with channelopathies. C.- All cohort concerning genes associated with cardiomyopathies. D.- SIDS cohort. E.- SIDS cohort concerning genes associated with channelopathies. F.- SIDS cohort concerning genes associated with cardiomyopathies. G.- Young cohort. H.- Young cohort genes associated with channelopathies. I.- Young cohort genes associated with cardiomyopathies.

## Tables

**Table 1.- Genetic data of rare variants.**

| Case | Age  | Sex | Situation of death | Macroscopic Heart | Microscopic Heart | Toxicology | Family History | Gene          | Nucleotide  | Protein       | dbSNP        | ExAC 2017 | GnomAD 2022 | ACMG 2017 | ACMG 2022 |
|------|------|-----|--------------------|-------------------|-------------------|------------|----------------|---------------|-------------|---------------|--------------|-----------|-------------|-----------|-----------|
| 1    | <1 y | M   | Sleeping           | Normal            | Normal            | Negative   | Negative       | <i>FBNI</i>   | c.6854A>G   | p.Asp2285Gly  | rs1160071679 | NA        | NA          | VUS       | VUS       |
| 2    | <1 y | F   | Sleeping           | Normal            | Normal            | Negative   | Negative       | <i>RYR2</i>   | c.5239G>A   | p.Gly1747Ser  | rs1553522190 | NA        | NA          | VUS       | VUS (LP)  |
| 3    | <1 y | M   | Sleeping           | Normal            | Normal            | Negative   | Negative       | <i>RYR2</i>   | c.505C>T    | p.Arg169Ter   | rs749930577  | NA        | 0.0004      | VUS       | VUS (LP)  |
| 4    | <1 y | M   | Sleeping           | Normal            | Normal            | Negative   | Negative       | <i>KCNJ5</i>  | c.1123C>T   | p.Arg375Trp   | rs142454198  | 0.0041    | 0.0035      | VUS       | VUS       |
| 5    | <1 y | F   | Sleeping           | Normal            | Normal            | Negative   | Negative       | <i>TTN</i>    | c.58483G>C  | p.Val19495Leu | rs768057735  | NA        | 0.0064      | VUS       | VUS (LB)  |
| 6    | <1 y | M   | Sleeping           | Normal            | Normal            | Negative   | Negative       | <i>TTN</i>    | c.67781G>C  | p.Ser22594Thr | rs750324994  | NA        | 0.0012      | VUS       | VUS (LB)  |
| 7    | <1 y | M   | Sleeping           | Normal            | Normal            | Negative   | Negative       | <i>MYH6</i>   | c.4907G>A   | p.Arg1636His  | rs746448302  | NA        | 0.0011      | VUS       | VUS (LB)  |
| 8    | <1 y | F   | Sleeping           | Normal            | Normal            | Negative   | Negative       | <i>TTN</i>    | c.49331C>G  | p.Pro16444Arg | rs777291480  | NA        | 0.0016      | VUS       | VUS (LB)  |
| 9    | <1 y | M   | Sleeping           | Normal            | Normal            | Negative   | Negative       | <i>KCNH2</i>  | c.874C>T    | p.Arg292Cys   | rs1196644896 | NA        | NA          | VUS       | VUS (LP)  |
| 10   | <1 y | M   | Sleeping           | Normal            | Slight fibrosis   | Negative   | Negative       | <i>TTN</i>    | c.76241T>C  | p.Ile25414Thr | rs773976497  | NA        | NA          | VUS       | VUS       |
| 11   | <1 y | M   | Sleeping           | Normal            | Normal            | Negative   | Negative       | <i>KCNH2</i>  | c.1558-5C>T | NA            | rs114186001  | NA        | 0.16        | VUS       | B         |
| 12   | <1 y | M   | Sleeping           | Normal            | Normal            | Negative   | Negative       | <i>TTN</i>    | c.70546G>C  | p.Val23516Leu | NA           | NA        | NA          | VUS       | VUS       |
| 13   | <1 y | F   | Sleeping           | Normal            | Normal            | Negative   | Negative       | <i>EMD</i>    | c.746A>G    | p.Glu249Gly   | rs781947413  | NA        | 0.0049      | VUS       | VUS (LB)  |
| 14   | <1 y | F   | Sleeping           | Normal            | Normal            | Negative   | Negative       | <i>DES</i>    | c.1375G>A   | p.Val459Ile   | rs73991549   | NA        | 0.249       | VUS       | B         |
| 15   | <1 y | M   | Sleeping           | Normal            | Normal            | Negative   | Negative       | <i>NOTCH1</i> | c.7223T>C   | p.Leu2408Pro  | rs767728582  | 0.0017    | 0.0095      | VUS       | VUS (LB)  |
| 16   | <1 y | F   | Sleeping           | Normal            | Normal            | Negative   | Negative       | <i>AKAP9</i>  | c.6806A>G   | p.Asp2269Gly  | rs765553799  | NA        | 0.0003      | VUS       | VUS (LP)  |
| 17   | <1 y | M   | Sleeping           | Normal            | Normal            | Negative   | Negative       | <i>SCN10A</i> | c.1676A>T   | p.Asn559Ile   | NA           | NA        | NA          | VUS       | VUS (LP)  |
| 18   | <1 y | M   | Sleeping           | Normal            | Normal            | Negative   | Negative       | <i>ANK2</i>   | c.9439G>A   | p.Val3147Met  | NA           | NA        | NA          | VUS       | VUS (LP)  |
| 19   | <1 y | F   | Sleeping           | Normal            | Normal            | Negative   | Negative       | <i>FBNI</i>   | c.6161A>G   | p.Gln2054Arg  | NA           | NA        | NA          | VUS       | VUS       |
| 20   | <1 y | F   | Sleeping           | Normal            | Normal            | Negative   | Negative       | <i>LAMA4</i>  | c.3617A>G   | p.Gln1206Arg  | NA           | NA        | NA          | VUS       | VUS       |
| 21   | <1 y | M   | Sleeping           | Normal            | Normal            | Negative   | Negative       | <i>MYLK2</i>  | c.77G>A     | p.Gly26Asp    | rs765105352  | 0.0008    | 0.0008      | VUS       | VUS       |

|    |      |   |                                 |        |                 |          |          |               |                   |               |              |        |        |     |          |
|----|------|---|---------------------------------|--------|-----------------|----------|----------|---------------|-------------------|---------------|--------------|--------|--------|-----|----------|
| 22 | <1 y | M | Sleeping                        | Normal | Normal          | Negative | Negative | <i>DSP</i>    | c.7153C>T         | p.Arg2385Cys  | rs755395467  | 0.0008 | 0.0003 | VUS | VUS      |
| 23 | <1 y | M | Sleeping                        | Normal | Normal          | Negative | Negative | <i>DMPK</i>   | c.535G>T          | p.Ala179Ser   | NA           | NA     | NA     | VUS | VUS      |
| 24 | <1 y | M | Sleeping                        | Normal | Normal          | Negative | Negative | <i>MYH6</i>   | c.2341G>T         | p.Glu781Ter   | NA           | NA     | NA     | VUS | VUS      |
|    |      |   |                                 |        |                 |          |          | <i>AKAP9</i>  | c.7219G>C         | p.Glu2407Gln  | NA           | NA     | NA     | VUS | VUS (LP) |
| 25 | <1 y | F | Sleeping                        | Normal | Normal          | Negative | Negative | <i>SLMAP</i>  | c.829-5C>T        | NA            | rs1261534362 | NA     | 0.0004 | VUS | VUS      |
| 26 | <1 y | M | Sleeping                        | Normal | Normal          | Negative | Negative | <i>AKAP9</i>  | c.6194T>C         | p.Met2065Thr  | NA           | NA     | NA     | VUS | VUS (LP) |
| 27 | <1 y | M | Sleeping                        | Normal | Normal          | Negative | Negative | <i>TTN</i>    | c.84587C>A        | p.Thr28196Lys | rs376537509  | 0.0008 | 0.0016 | VUS | VUS (LB) |
| 28 | <1 y | F | Sleeping                        | Normal | Slight fibrosis | Negative | Negative | <i>NEBL</i>   | c.1659A>T         | p.Glu553Asp   | rs779426326  | 0.0016 | 0.0016 | VUS | VUS (LB) |
| 29 | <1 y | F | Sleeping                        | Normal | Normal          | Negative | Negative | <i>TTN</i>    | c.99566A>G        | p.Tyr33189Cys | rs932225386  | NA     | NA     | VUS | VUS      |
| 30 | <1 y | M | Sleeping                        | Normal | Normal          | Negative | Negative | <i>BAG3</i>   | c.31C>G           | p.Gln11Glu    | NA           | NA     | NA     | VUS | VUS      |
| 31 | <1 y | F | Sleeping                        | Normal | Normal          | Negative | Negative | <i>KCNA5</i>  | c.640C>T          | p.Arg214Cys   | rs3197074    | 0.0008 | 0.0039 | VUS | VUS      |
| 32 | <1 y | F | Sleeping                        | Normal | Normal          | Negative | Negative | <i>COL3A1</i> | c.3209C>G         | p.Ala1070Gly  | NA           | NA     | NA     | VUS | VUS      |
| 33 | <1 y | M | Sleeping                        | Normal | Normal          | Negative | Negative | <i>SCN5A</i>  | c.142G>A          | p.Glu48Lys    | rs199473048  | 0.0025 | 0.0052 | VUS | VUS      |
| 34 | <1 y | M | Sleeping                        | Normal | Slight fibrosis | Negative | Negative | <i>TTN</i>    | c.63271G>A        | p.Gly21091Ser | rs376256345  | NA     | 0.0044 | VUS | VUS (LB) |
| 35 | <1 y | F | Sleeping                        | Normal | Normal          | Negative | Negative | <i>SCN5A</i>  | c.5055G>C         | p.Glu1685Asp  | NA           | NA     | NA     | VUS | VUS (LP) |
| 36 | <1 y | M | Sleeping                        | Normal | Normal          | Negative | Negative | <i>KCNQ1</i>  | c.1861G>A         | p.Gly621Ser   | rs199472820  | NA     | 0.0051 | VUS | VUS      |
| 37 | <1 y | F | Sleeping                        | Normal | Normal          | Negative | Negative | <i>AKAP9</i>  | c.4927A>C         | p.Ile1643Leu  | rs141990258  | 0.0077 | NA     | VUS | VUS (LP) |
| 38 | 2 y  | F | Sleeping                        | Normal | Normal          | Negative | Negative | <i>DSP</i>    | c.916G>A          | p.Ala306Thr   | rs368193211  | 0.0077 | 0.0051 | VUS | VUS (LB) |
| 39 | 3 y  | M | Emotion,<br>stress,<br>exercise | Normal | Slight fibrosis | Negative | Negative | <i>DSP</i>    | c.314G>A          | p.Arg105Gln   | rs762238621  | NA     | 0.0023 | VUS | VUS (LB) |
|    |      |   |                                 |        |                 |          |          |               |                   |               |              |        |        |     |          |
| 40 | 3 y  | M | Sleeping                        | Normal | Normal          | Negative | Negative | <i>TTN</i>    | c.5577G>C         | p.Arg1859Ser  | NA           | NA     | NA     | VUS | VUS      |
|    |      |   |                                 |        |                 |          |          | <i>TTN</i>    | c.89494C>A        | p.Pro29832Thr | rs373876117  | NA     | 0.0119 | VUS | LB       |
| 41 | 3 y  | M | Sleeping                        | Normal | Normal          | Negative | Negative | <i>TTN</i>    | c.69373delATinsGA | p.Ile23125Asp | NA           | NA     | NA     | VUS | VUS      |

|    |      |   |                                 |        |                        |          |          |                            |            |              |             |        |        |     |          |
|----|------|---|---------------------------------|--------|------------------------|----------|----------|----------------------------|------------|--------------|-------------|--------|--------|-----|----------|
| 42 | 10 y | M | Emotion,<br>stress,<br>exercise | Normal | Diffuse<br>myocarditis | Negative | Negative | <i>MYH7</i><br><i>PKP2</i> | c.4772T>A  | p.Leu1591Gln | rs61737004  | NA     | 0.0039 | VUS | VUS (LB) |
|    |      |   |                                 |        |                        |          |          |                            | c.1237C>T  | p.Arg413Ter  | rs372827156 | 0.0077 | 0.0011 | VUS | VUS (LP) |
| 43 | 10 y | M | Sleeping                        | Normal | Normal                 | Negative | Negative | <i>KCNH2</i>               | c.2674C>T  | p.Arg892Cys  | rs201627778 | 0.0154 | 0.0442 | VUS | LB       |
| 44 | 12 y | M | Sleeping                        | Normal | Normal                 | Negative | Negative | <i>GPD1L</i>               | c.1009G>T  | p.Val337Phe  | NA          | NA     | NA     | VUS | VUS      |
| 45 | 12 y | M | Emotion,<br>stress,<br>exercise | Normal | Normal                 | Negative | Negative | <i>RYR2</i>                | c.217C>G   | p.Leu73Val   | rs777753947 | NA     | NA     | VUS | VUS (LP) |
|    |      |   |                                 |        |                        |          |          | <i>MYBPC3</i>              | c.2398G>A  | p.Gly800Arg  | rs727504574 | NA     | 0.0031 | VUS | VUS (LB) |
|    |      |   |                                 |        |                        |          |          | <i>PKP2</i>                | c.14G>A    | p.Gly5Asp    | rs774778142 | NA     | 0.0036 | VUS | VUS (LB) |
| 46 | 14 y | F | Emotion,<br>stress,<br>exercise | Normal | Normal                 | Negative | Negative | <i>ANK2</i>                | c.7148C>T  | p.Pro2383Leu | rs35960628  | 0.0308 | 0.0119 | VUS | VUS (LB) |
|    |      |   |                                 |        |                        |          |          | <i>TGFB3</i>               | c.755-5T>C | NA           | rs768188445 | NA     | 0.0007 | VUS | VUS      |
| 47 | 15 y | M | Emotion,<br>stress,<br>exercise | Normal | Normal                 | Negative | Negative | <i>ANK2</i>                | c.7397G>A  | p.Arg2466His | rs142078935 | 0.076  | 0.0714 | VUS | LB       |
| 48 | 15 y | F | Emotion,<br>stress,<br>exercise | Normal | Normal                 | Negative | Negative | <i>MYH7</i>                | c.2011C>T  | p.Arg671Cys  | rs727503263 | NA     | NA     | VUS | VUS      |
| 49 | 16 y | M | Emotion,<br>stress,<br>exercise | Normal | Normal                 | Negative | Negative | <i>KCNH2</i>               | c.526C>T   | p.Arg176Trp  | rs36210422  | NA     | 0.0324 | VUS | LB       |
| 50 | 16y  | M | Emotion,<br>stress,<br>exercise | Normal | Normal                 | Negative | Negative | <i>RyR2</i>                | c.32T>C    | p.Ile11Ser   | rs794728760 | NA     | NA     | VUS | VUS (LP) |
| 51 | 16 y | M | Emotion,<br>stress,<br>exercise | Normal | Slight fibrosis        | Negative | Negative | <i>TNNI3</i>               | c.611G>A   | p.Arg204His  | rs727504275 | NA     | NA     | VUS | VUS      |



**Table 2.- Cohort analyzed.**

|                |                           | Cases                            | < 1 year | 1 – 16 years | Total |
|----------------|---------------------------|----------------------------------|----------|--------------|-------|
|                |                           |                                  | 37       | 14           | 51    |
| <b>Males</b>   | <b>Situation of death</b> | <b>Sleeping</b>                  | 22       | 4            | 33    |
|                |                           | <b>Emotion, stress, exercise</b> | 0        | 7            |       |
| <b>Females</b> | <b>Situation of death</b> | <b>Sleeping</b>                  | 15       | 1            | 18    |
|                |                           | <b>Emotion, stress, exercise</b> | 0        | 2            |       |

# Figures

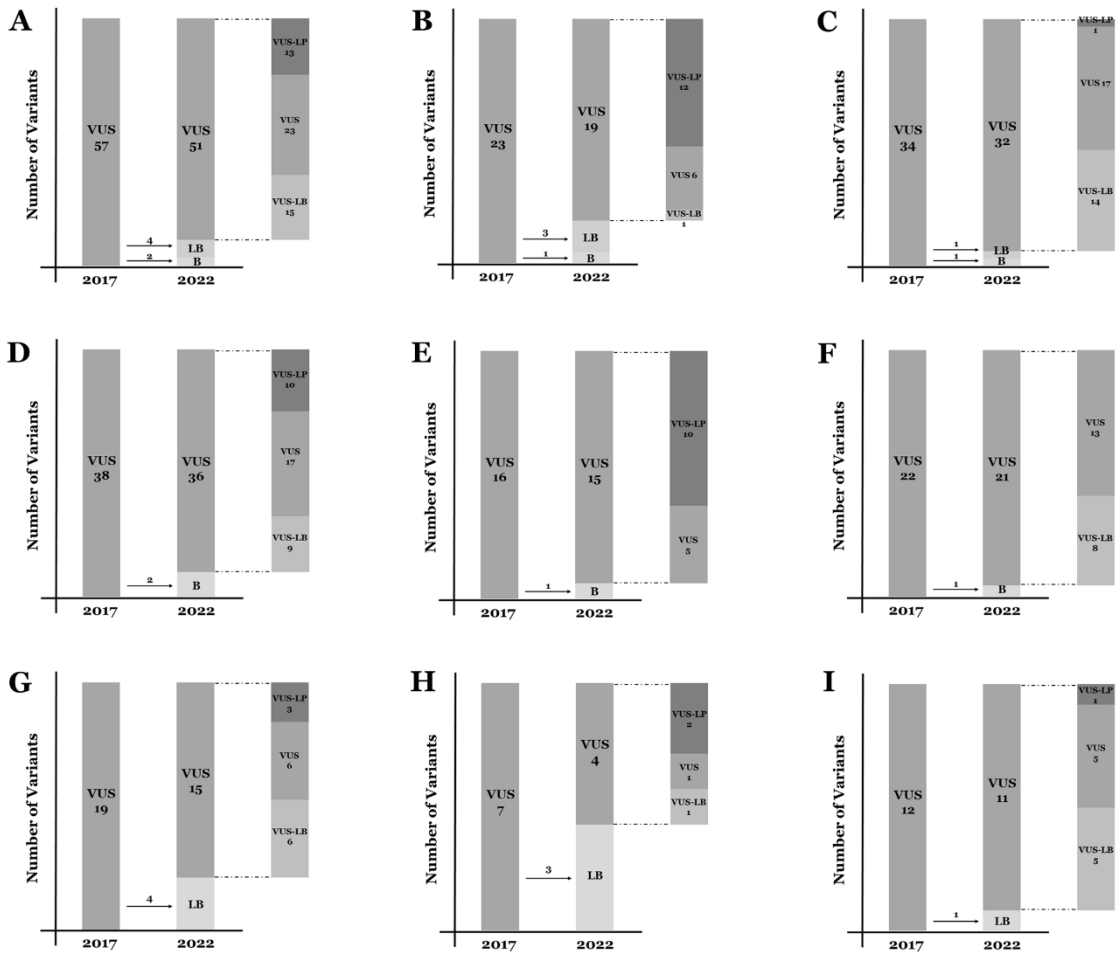

Supplement: 414_2023_2951_MOESM1_ESM.pdf [file 414_2023_2951_MOESM1_ESM.pdf]
